# Supplementary material for: Fast and highly sensitive humidity sensors based on NaNbO3 nanofibers
Source: Royal Society of Chemistry journal article supplement (doi:10.1039/c5ra00205b), 2015-01-01

**Fig. S1** The Energy dispersive spectrum (EDS) analysis result of the electrospun  $\text{NaNbO}_3$  nanofibers. The inset picture shows the measured area of the sample. The result confirms that the nanofiber is consisted of pure Na, Nb and O elements.

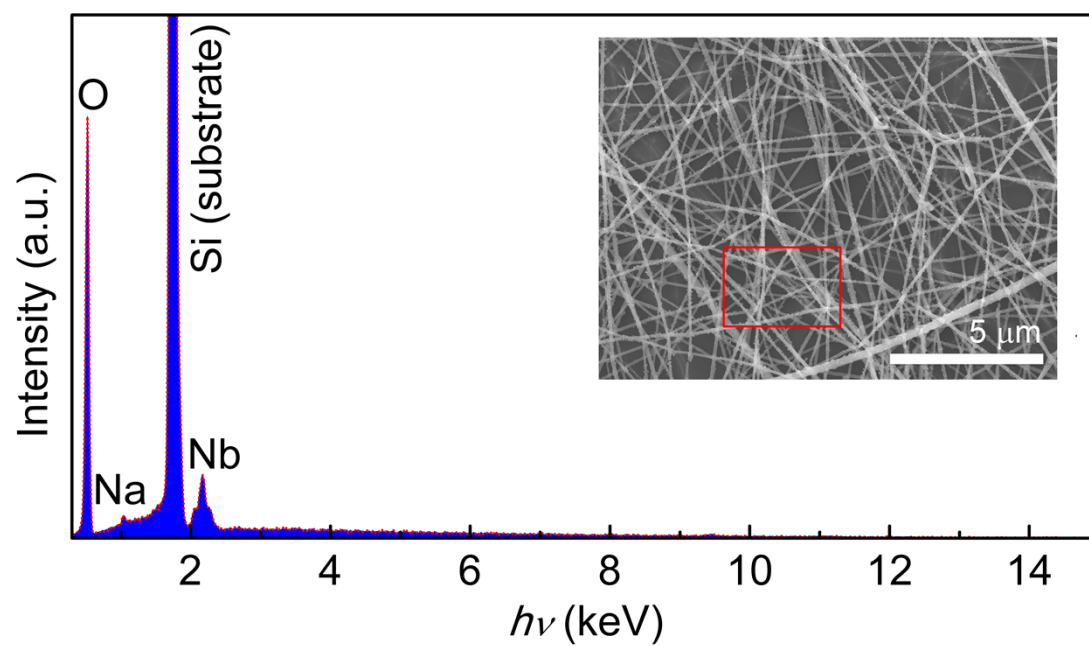

Supplement: c5ra00205b1.pdf [file c5ra00205b1.pdf]
